# Supplementary material
Source: ML conference proceedings conference paper supplement (https://proceedings.mlr.press/v80/colas18a.html)
Supplement: Supplementary file 1 [file colas18a-supp.zip › supplementary.pdf]

# GEP-PG: Decoupling exploration and exploitation in deep Reinforcement Learning algorithms

## Supplementary material

Cédric Colas<sup>1</sup>, Olivier Sigaud<sup>1,2</sup> and Pierre-Yves Oudeyer<sup>1</sup>

<sup>1</sup>INRIA, Flowers team, Bordeaux, France

<sup>2</sup>Sorbonne Université, ISIR, Paris, France

### A Study of DDPG variability

In this section we investigate performance variability in DDPG. The authors of [1] showed that averaging the performance of two randomly selected splits of 5 runs with different random seeds can lead to statistically different distributions. This considerably undermines previous results, as most of the community ([1] included) has been using 5 seeds or less, see [1]. Here we use a larger statistical sample of 20 random seeds and show that it is enough to counter the variance effect. We run the baseline DDPG algorithm with  $\text{OU}(\sigma = 0.3)$  noise 40 times on Continuous Mountain Car and Half-Cheetah. We randomly select two pairs of 20 sets and perform statistical tests to compare their performance. We repeat this procedure 1000 times and report the percentages of tests showing a significant difference between both sets (Table 1(b) and 1(a)). We report results for both evaluation metrics and two tests: two-sample t-test (t-test) and bootstrapped (BS) estimation of the 95% confidence interval for the mean difference (positive if the interval does not contain 0).

Table 1: Percentage of tests showing differences between two sets of the same algorithm: DDPG  $\text{OU}(0.3)$  on (a) CMC, (b) HC.

| (a)    |             |              | (b)    |             |              |
|--------|-------------|--------------|--------|-------------|--------------|
|        | abs. metric | final metric |        | abs. metric | final metric |
| t-test | 0.0%        | 0.0%         | t-test | 0.0%        | 0.0%         |
| BS     | 0.0%        | 5.1%         | BS     | 0.0%        | 0.0%         |

## B Correlation between evaluation metrics

We use two performance metrics: (1) the *absolute metric* is the average performance over 100 test episodes using the best controller over the whole learning process; (2) the *final metric*, corresponding to the evaluation methodology of [1] is the average over the 100 last test episodes of the learning process, 10 episodes for each of the last 10 different controllers.

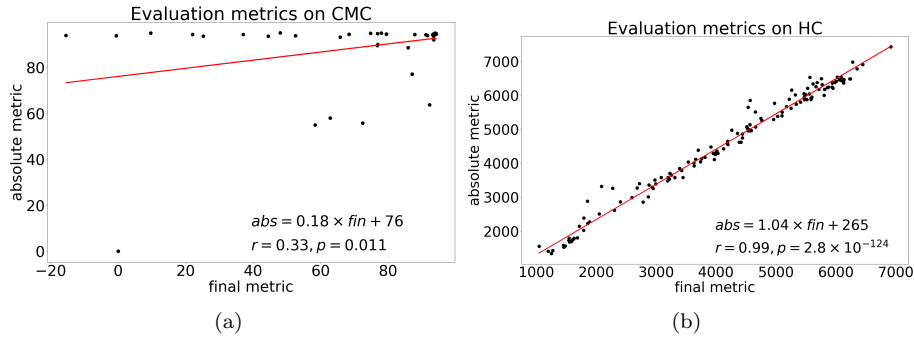

Figure 1: Correlation of the two metrics of performance on (a) CMC and (b) HC. The equations of the lines of best fit (in red), the Pearson coefficients  $r$  and their associated p-values  $p$  are provided.

As highlighted in Appendix Figure 2 of Appendix C, DDPG performance on CMC is highly unstable. The final metric only gives a measure of the final performance, which might not represent the algorithm’s ability to find a good policy. Figure ?? shows this problem for the GEP-PG runs: even though the Pearson correlation coefficient is found significant, the line slope is far from 1. The final metric is highly variable whereas the absolute metric almost always shows a good performance. On the opposite, Appendix Figure ?? shows that final metrics and absolute metrics of DDPG performance on HC are highly correlated with a slope close to 1. This can be seen on Figures 1(c) and 2(c) where all learning curves are strictly increasing: the highest performance is always among the last ones. As a result, it is better to report the *absolute metric*, representing the performance of the best policy over a run. In the case of unstable learning as in CMC, we find it informative to present different runs so as to get a better sense of the learning dynamics. This is done in the next section.

## C Individual runs on CMC

Figure 2 shows a representative example of 20 runs of DDPG with standard OU noise ( $\mu = 0, \sigma = 0.3$ ). One can see that most runs never find the rewarding goal and that the learning performance of those which do so is unstable. As a result, the distribution of performances is not normal.

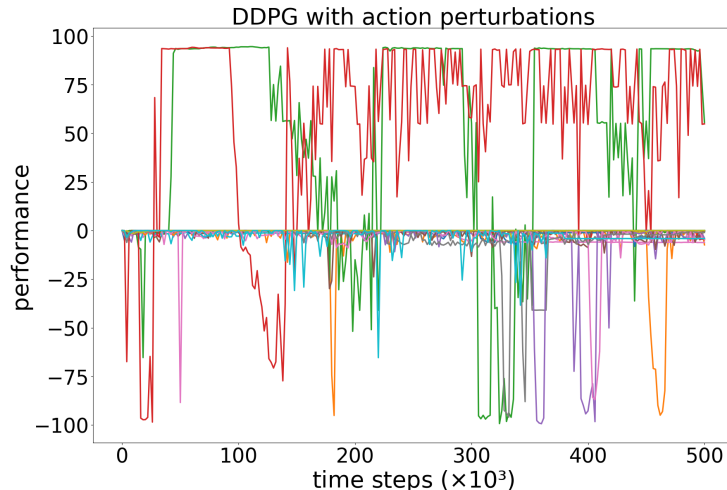

Figure 2: Twenty individual runs of DDPG OU(0.3) on CMC

## D Performance comparisons

Below we present statistical comparisons of the performance of various pairs of algorithms on HC. For comparisons, we use the 2-sample t-test (t-test) and a measure of the 95% confidence interval computed by bootstrap (BS) using  $10^4$  samples. The Scipy implementation is used for t-test and the Facebook Bootstrapped implementation for BS. For the t-test, we present the test value with the p-value in brackets, the difference being significant when  $p \leq 0.05$ . For BS, we present the mean and bounds of the 95% confidence interval for the difference between the two sets of performances. It is positive if the interval does not contain 0.

Table 2: DDPG param. pert. versus DDPG action pert.

|        | absolute metric               | final metric                 |
|--------|-------------------------------|------------------------------|
| t-test | 3.74 ( $6.0 \times 10^{-4}$ ) | 3.5 ( $1.2 \times 10^{-3}$ ) |
| BS     | 1502 (736, 2272)              | 1364 (641, 2120)             |

DDPG with parameter perturbation achieves a significantly higher final (2/2) and absolute performance (2/2) than DDPG with action perturbation.

Table 3: DDPG OU(0.3) versus decreasing OU(0.6), action pert.

|        | absolute metric  | final metric     |
|--------|------------------|------------------|
| t-test | 1.1 (0.29)       | 1.4 (0.16)       |
| BS     | 425 (-330, 1196) | 534 (-151, 1257) |

There is no statistical evidence that DDPG with OU(0.3) achieves higher final or absolute performance than the decreasing OU(0.6) version.

Table 4: DDPG action pert. versus GEP

|        | absolute metric              | final metric                 |
|--------|------------------------------|------------------------------|
| t-test | 5.3 ( $7.6 \times 10^{-6}$ ) | 4.6 ( $4.9 \times 10^{-5}$ ) |
| BS     | 1804 (1151, 2476)            | 1491 (893, 2115)             |

DDPG with action perturbation achieves significantly higher final and absolute performance than GEP, 2/2 tests for both metrics.

Table 5: GEP linear policy versus GEP complex policy (64,64)

|        | absolute metric | final metric    |
|--------|-----------------|-----------------|
| KS     | 0.15 (0.96)     | 0.20 (0.77)     |
| t-test | 0.32 (0.75)     | 0.52 (0.60)     |
| BS     | 787 (-404, 552) | 128 (-350, 595) |

The complexity of the GEP policy is not found to make any difference in absolute or final performance.

Table 6: GEP-PG versus DDPG with action perturbation

|        | absolute metric              | final metric                 |
|--------|------------------------------|------------------------------|
| t-test | 3.2 ( $2.7 \times 10^{-3}$ ) | 3.0 ( $4.6 \times 10^{-3}$ ) |
| BS     | 1089 (448, 1726)             | 924 (334, 1503)              |

GEP-PG achieves significantly higher absolute and final performance than DDPG, both using action perturbation (2/2 tests for both performance metrics)

Table 7: GEP-PG versus DDPG, parameter perturbation

|        | absolute metric              | final metric                 |
|--------|------------------------------|------------------------------|
| t-test | 2.1 ( $4.8 \times 10^{-2}$ ) | 2.4 ( $2.3 \times 10^{-2}$ ) |
| BS     | 672 (39, 1261)               | 780 (143, 1378)              |

GEP-PG achieves significantly higher absolute and final performance than DDPG, both using parameter perturbation (2/2 tests with both performance metrics).

## E Histograms of performance on HC

Here we show the histograms of the absolute metrics of HC (Figure 3). We can see that the GEP-PG versions of DDPG algorithms show a smaller variance.

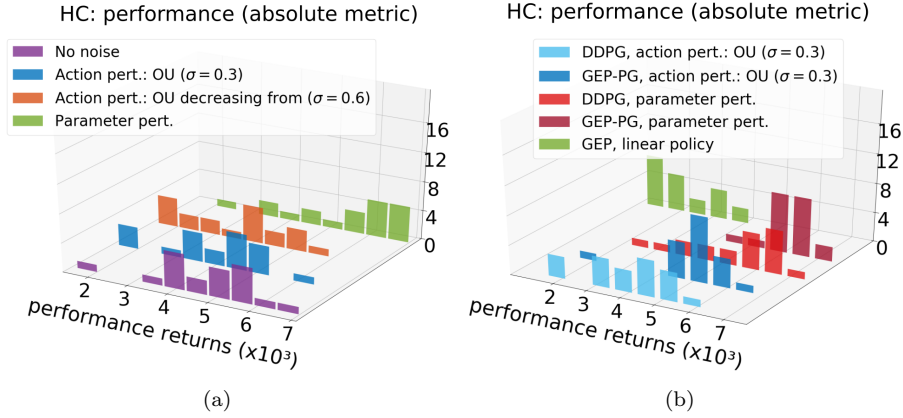

Figure 3: Absolute metric in HC for the various algorithms.(a) shows the influence of undirected exploration with perturbations on performance. (b) show the performances of GEP, DDPG and their combination GEP-PG on HC.

## F Influence of policy complexity in gep

Using a linear or a more complex policy with GEP does not impact the final GEP performances on CMC or HC (no test over 5 shows significance). However, in the case of HC, the version of GEP using a simple linear policy achieves higher performance sooner. The statistical tests show significance at  $2 \cdot 10^5$  steps with  $p = 7.3 \times 10^{-4}$  for KS,  $p = 2.3 \times 10^{-4}$  for t-test and a bootstrapped confidence interval of 738 (395, 1080). This is important in terms of sample efficiency and a DDPG replay buffer of  $2 \cdot 10^5$  samples filled by GEP would probably be of higher interest if the policy was linear. This supports the idea developed in Section 3.3 that a smaller policy parameter space might be faster to explore.

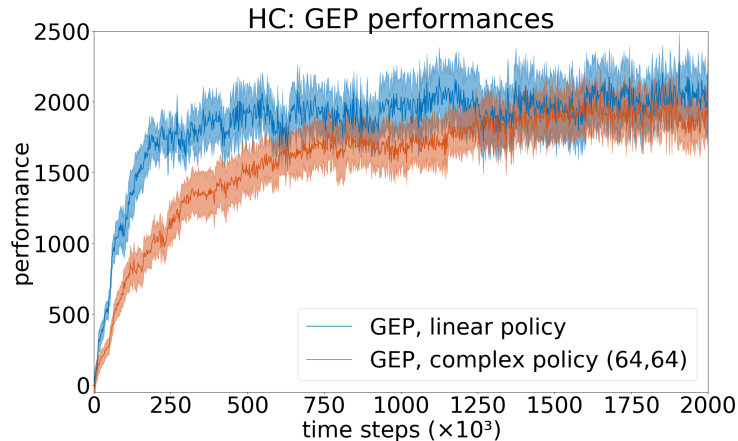

Figure 4: Performance of GEP for a linear and a policy with two hidden layers of (64,64) neurons.

## G Influence of the initial replay buffer content

Here we study the influence of the content of the replay buffer filled by GEP to bootstrap DDPG on the performance of GEP-PG. First, we found that the size of this buffer does not influence GEP-PG performance (from 100 to 2000 episodes), although too few episodes harms GEP-PG performance ( $< 100$  episodes; Figure 5). Second, we found that GEP-PG performance correlates with the performance of the best GEP policy ( $p < 2 \times 10^{-6}$ ) (Appendix-Figure 5) and the average performance of all GEP policies ( $p < 4 \times 10^{-8}$ ). Third, we found correlations between GEP-PG performance and various measures of exploration diversity: 1) the standard deviation of GEP policies performances ( $p < 3 \times 10^{-10}$ ); 2) the standard deviation of the observation vectors averaged across dimensions. This quantifies the diversity of sensory inputs. ( $p < 3 \times 10^{-8}$ ); 3) the outcome diversity measured by the average distance to the k-nearest neighbors in outcome space (for various k). This measure is normalized by the average distance to the 1-nearest neighbor in the case of a uniform distribution, which makes it insensitive to the sample size ( $p < 4 \times 10^{-10}$ ), see Appendix-Figure 6; 4) the percentage of cells filled when the outcome space is discretized (with various number of cells). We also use a number of cells equal to the number of points, which make the measure insensitive to this number ( $p < 4 \times 10^{-5}$ ); 5) the discretized entropy with various number of cells ( $p < 6 \times 10^{-7}$ ).

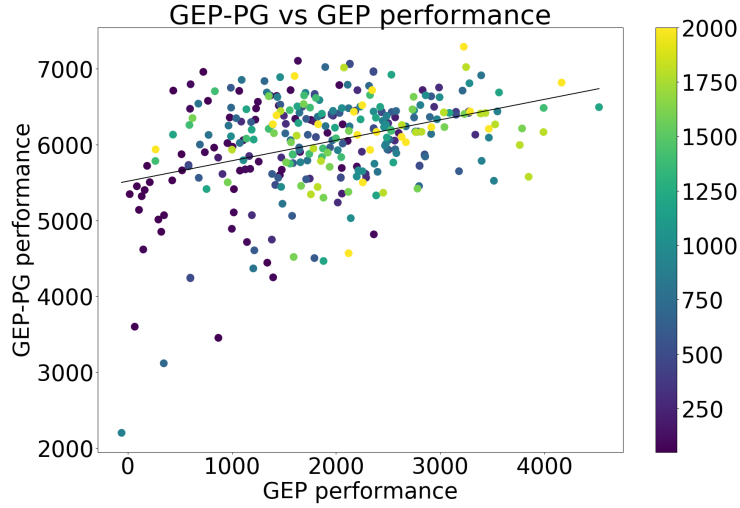

Figure 5: GEP-PG performance as a function of the GEP buffer performance. The GEP performance is evaluated by replaying 100 times the best policy found by GEP. Color maps for the size of the replay buffer (the number of episodes played by GEP).

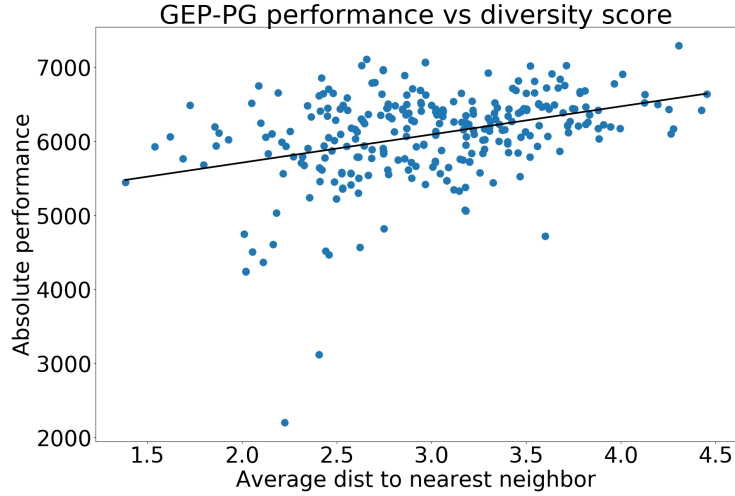

Figure 6: GEP-PG performance as a function of the buffer's diversity measure. The diversity measure is computed as the average distance to the nearest neighbor in outcome space. It is normalized by the expected value of this measure in the case of a uniform distribution of outcomes. This normalization makes the measure insensitive to the number of considered samples (here through the size of the buffer).

## H Sanity check

We could think of other exploration strategies to fill the replay buffer: a) using DDPG exploration with action perturbations to fill the buffer during 500 episodes (learning rate is zero); b) doing the same with DDPG parameter perturbations; c) using samples collected from random policies (RP-PG). Appendix-Figure 7 compares these strategies to DDPG with parameter perturbations and its corresponding GEP-PG version. Filling the replay buffer with exploration performed in the parameter space (b or c) seems not to impede DDPG performance and even reduces variance. Finally, GEP-PG still outperforms all versions of DDPG combined with undirected exploration strategies (2/2 tests positive on final metric, only bootstrap test on absolute metric).

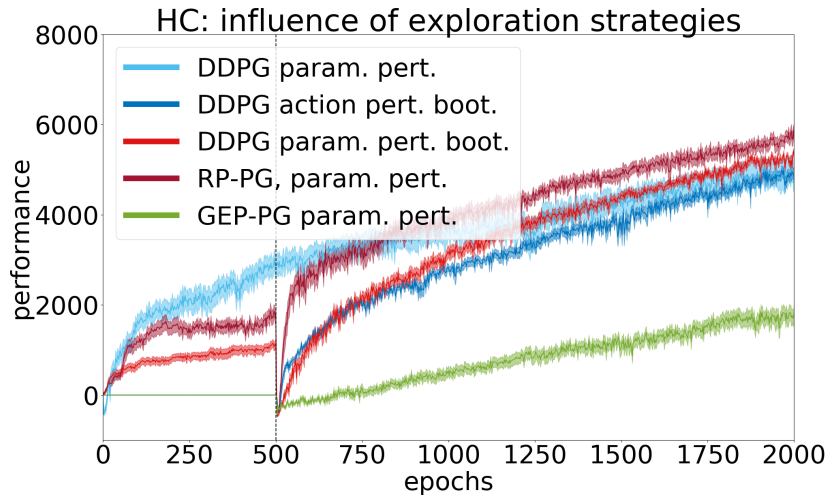

Figure 7: Influence of various exploration strategies to initialize DDPG’s replay buffer on GEP-PG performance. The second and third curves corresponds to a version of DDPG in which the networks are not updated during the exploration phase. The exploration is directly implemented by DDPG.

## References

- [1] Peter Henderson, Riashat Islam, Philip Bachman, Joelle Pineau, Doina Precup, and David Meger. Deep reinforcement learning that matters. *arXiv preprint arXiv:1709.06560*, 2017.
